# Supplementary material for: Evolutionary Consequences of DNA Methylation on the GC Content in Vertebrate Genomes
Source: PubMed Central journal article supplement (PMC4349097; doi:10.1534/g3.114.015545), 2015-01-15
Supplement: supp_g3.114.015545_015545SI.pdf [file supp_g3.114.015545_015545SI.pdf]

# Evolutionary consequences of DNA methylation on the GC content in vertebrate genomes

Carina F. Mugal<sup>\*</sup>, Peter F. Arndt<sup>§</sup>, Lena Holm<sup>†</sup> and Hans Ellegren<sup>\*</sup>

<sup>\*</sup> Dept of Ecology and Genetics, Uppsala University, Norbyvägen 18D, SE-752 36 Uppsala, Sweden

<sup>§</sup> Department of Computational Molecular Biology, Max Planck Institute for Molecular Genetics, Ihnestrasse 63/73, DE-14195 Berlin, Germany

<sup>†</sup> Dept of Anatomy, Physiology and Biochemistry, Swedish University of Agricultural Sciences, Ulls väg 27 D-F, SE-756 51 Uppsala, Sweden

## Data accession

Chicken bisulfite sequencing data have been deposited in GEO with accession GSE56639.

## Author of correspondence

Carina F. Mugal, Dept of Ecology and Genetics, Uppsala University, Norbyvägen 18D, SE-752 36 Uppsala, Sweden, Phone: +46-18-4716417, Fax: +46-18-4716310, Email: [carina.mugal@ebc.uu.se](mailto:carina.mugal@ebc.uu.se)

DOI: 10.1534/g3.114.015545

Table S1: Multiple Linear Regression (MLR) analysis of CpG  $\rightarrow$  CpA/TpG substitution rate in relation to CpG methylation level and female recombination rate.

Partial correlations significant below a p-value threshold of 0.05 are printed in bold.

|                           | chicken             |                       | human               |                      |
|---------------------------|---------------------|-----------------------|---------------------|----------------------|
|                           | partial correlation | <i>p</i> -value       | partial correlation | <i>p</i> -value      |
| CpG methylation level     | <b>0.269</b>        | $1.30 \cdot 10^{-15}$ | <b>0.369</b>        | $< 2 \cdot 10^{-16}$ |
| Female recombination rate | <b>-0.436</b>       | $< 2 \cdot 10^{-16}$  | -0.029              | $3.49 \cdot 10^{-1}$ |
|                           | $R^2 = 0.27$        |                       | $R^2 = 0.14$        |                      |

Table S2: Multiple Linear Regression (MLR) analysis of CpG  $\rightarrow$  CpA/TpG substitution rate in relation to CpG methylation level and male recombination rate.

Partial correlations significant below a  $p$ -value threshold of 0.05 are printed in bold.

|                         | chicken             |                      | human               |                      |
|-------------------------|---------------------|----------------------|---------------------|----------------------|
|                         | partial correlation | $p$ -value           | partial correlation | $p$ -value           |
| CpG methylation level   | <b>0.299</b>        | $< 2 \cdot 10^{-16}$ | <b>0.371</b>        | $< 2 \cdot 10^{-16}$ |
| Male recombination rate | <b>-0.490</b>       | $< 2 \cdot 10^{-16}$ | -0.057              | $6.30 \cdot 10^{-2}$ |
|                         | $R^2 = 0.32$        |                      | $R^2 = 0.14$        |                      |
