# Supplementary material for: Evolutionary Consequences of DNA Methylation on the GC Content in Vertebrate Genomes
Source: PubMed Central journal article supplement (PMC4349097; doi:10.1534/g3.114.015545), 2015-01-15
Supplement: supp_g3.114.015545_TableS1.pdf [file supp_g3.114.015545_TableS1.pdf]

Table S1: Multiple Linear Regression (MLR) analysis of CpG  $\rightarrow$  CpA/TpG substitution rate in relation to CpG methylation level and female recombination rate.

Partial correlations significant below a p-value threshold of 0.05 are printed in bold.

|                           | chicken             |                       | human               |                      |
|---------------------------|---------------------|-----------------------|---------------------|----------------------|
|                           | partial correlation | <i>p</i> -value       | partial correlation | <i>p</i> -value      |
| CpG methylation level     | <b>0.269</b>        | $1.30 \cdot 10^{-15}$ | <b>0.369</b>        | $< 2 \cdot 10^{-16}$ |
| Female recombination rate | <b>-0.436</b>       | $< 2 \cdot 10^{-16}$  | -0.029              | $3.49 \cdot 10^{-1}$ |
|                           | $R^2 = 0.27$        |                       | $R^2 = 0.14$        |                      |
