# Supplementary material for: Evolutionary Consequences of DNA Methylation on the GC Content in Vertebrate Genomes
Source: PubMed Central journal article supplement (PMC4349097; doi:10.1534/g3.114.015545), 2015-01-15
Supplement: supp_g3.114.015545_TableS2.pdf [file supp_g3.114.015545_TableS2.pdf]

Table S2: Multiple Linear Regression (MLR) analysis of CpG  $\rightarrow$  CpA/TpG substitution rate in relation to CpG methylation level and male recombination rate.

Partial correlations significant below a  $p$ -value threshold of 0.05 are printed in bold.

|                         | chicken             |                      | human               |                      |
|-------------------------|---------------------|----------------------|---------------------|----------------------|
|                         | partial correlation | $p$ -value           | partial correlation | $p$ -value           |
| CpG methylation level   | <b>0.299</b>        | $< 2 \cdot 10^{-16}$ | <b>0.371</b>        | $< 2 \cdot 10^{-16}$ |
| Male recombination rate | <b>-0.490</b>       | $< 2 \cdot 10^{-16}$ | -0.057              | $6.30 \cdot 10^{-2}$ |
|                         | $R^2 = 0.32$        |                      | $R^2 = 0.14$        |                      |
